# Supplementary material for: The FomYjeF Protein Influences the Sporulation and Virulence of Fusarium oxysporum f. sp. momordicae
Source: MDPI journal article supplement (doi:10.3390/ijms24087260), 2023-04-14
Supplement: s1 [file s1]

**The FomYjeF Protein Influences Sporulation and Virulence of *Fusarium*  
*oxysporum* f. sp. *momordicae***

**Chenxing Wei<sup>1,†</sup>, Caiyi Wen<sup>1,†</sup>, Yuanyuan Zhang<sup>1</sup>, Hongyan Du<sup>1</sup>, Rongrong Zhong<sup>1</sup>, Zhengzhe Guan<sup>1</sup>, Mengjiao Wang<sup>1</sup>, Yanhong Qin<sup>2</sup>, Fei Wang<sup>2</sup>, Luyang Song<sup>1</sup>, Ying Zhao<sup>1\*</sup>**

<sup>1</sup>College of Plant Protection, Henan Agricultural University, Zhengzhou 450046, China;

<sup>2</sup>Institute of Plant Protection, Henan Academy of Agricultural Sciences, Zhengzhou 450002, China

<sup>†</sup>These authors contributed equally to this work.

\*Corresponding author

Ying Zhao

218 Pingan Avenue, Zhengdong New District, Zhengzhou, Henan Province, China 450046

E-mail: zhaoying@henau.edu.cn

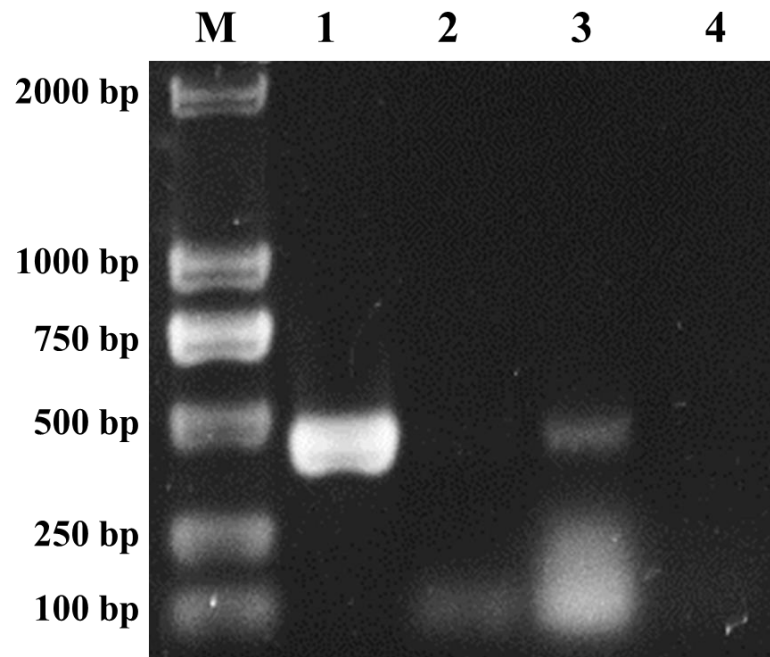

**Figure S1.** Confirmation of *FomYjeF* deletion and complemented by PCR. The FomYjeF-IN-F/R primer sets were used. Lane 1: wild-type SD-1; lane 2: FomYjeF-KO-2; lane 3: FomYjeF-CO-2; lane 4: MOCK (dd H<sub>2</sub>O<sub>2</sub>).

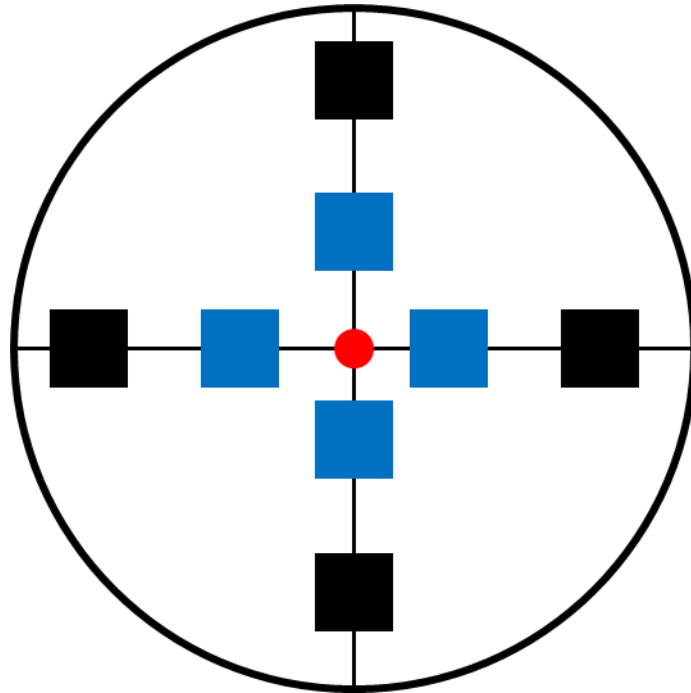

**Figure S2.** The schematic diagram of sampling points in Fig.2D. The black circle represents a petri dish and red circle represents a fungus cake. After culturing for 5 days, mycelia were sampled from the internal (blue square) and external (black square) of the petri dish. Each square measures one square centimeter.

**Table S1. Primer sets used in this study.**

| <b>Primer Names</b> | <b>Primer Sequence (5' to 3')</b> |
|---------------------|-----------------------------------|
| FomYjeF-S-F         | TGACAAATGTTGGATACAGGCG            |
| FomYjeF-S-R         | GATCGCCATAATGCCTTTGAAT            |
| FomYjeF-X-F         | ACATGGTTGGAACGATTGCG              |
| FomYjeF-X-R         | ATCAGCGGCTCCGTTTCAGT              |
| FomYjeF-IN-F        | AAGATTTCACTTCGGTCGCACA            |
| FomYjeF-IN-F        | CCATTCAACGATTCCCGCAG              |
| HY-R                | GTATTGACCGATTCCCTTGCGGTCCGAA      |
| YG-F                | GGCTTGGCTGGAGCTAGTGGAGGTCAA       |
| HYG-F               | GGCTTGGCTGGAGCTAGTGGAGGTCAA       |
| HYG-R               | AACCCGCGGTTCGGCATCTACTCTATTC      |
| FomYjeF-CO-F        | GGGGTACCCGTAAGGGTCGGGTTTAGGAAT    |
| FomYjeF-CO-R        | GGGGTACCTTTCTTCGGAATGGTATGCGTG    |
| Actin-F             | GGTAACCAAATCGGTGCTGCTTTC          |
| Actin-R             | ACCCTCAGTGTAGTGACCCTTGGC          |
| Type II myosin-F    | GCCATATTCTCCTCTCCTT               |
| Type II myosin-R    | AACCATGAGTTATTGCTGAT              |
| Wor1-like-F         | GGAACATGGTAATGAGTA                |
| Wor1-like-R         | ATGCTGATAGTCTTCTTG                |
| NoxR-F              | CATGATCGCTCCTGATAT                |
| NoxR-R              | ATGTCTTCGTCCTTAACC                |
| NoxA-F              | CTCAAGATTACACCTAT                 |
| NoxA-R              | TTGTTTCGTGATTGTAGTT               |
